# Supplementary material for: Fear no colors? Observer clothing color influences lizard escape behavior
Source: PubMed Central journal article supplement (PMC5549895; doi:10.1371/journal.pone.0182146), 2017-08-09

**t-shirts**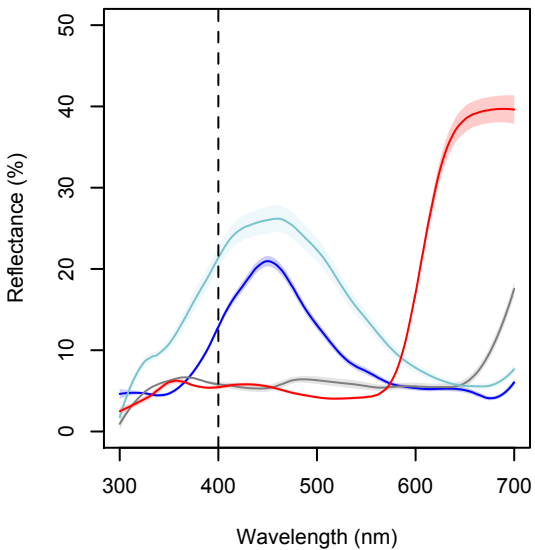**abdominal blue**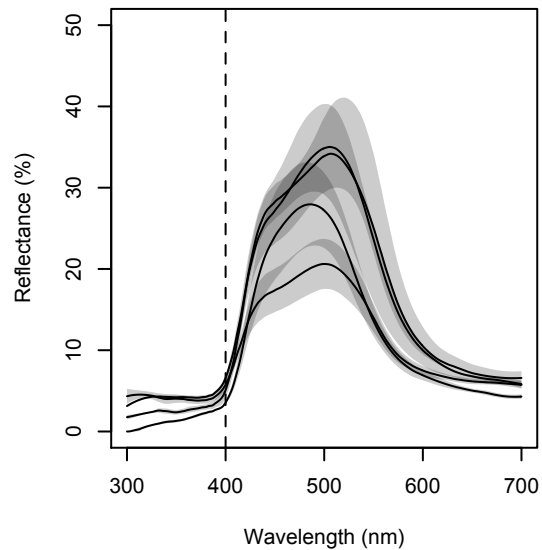**abdominal black border**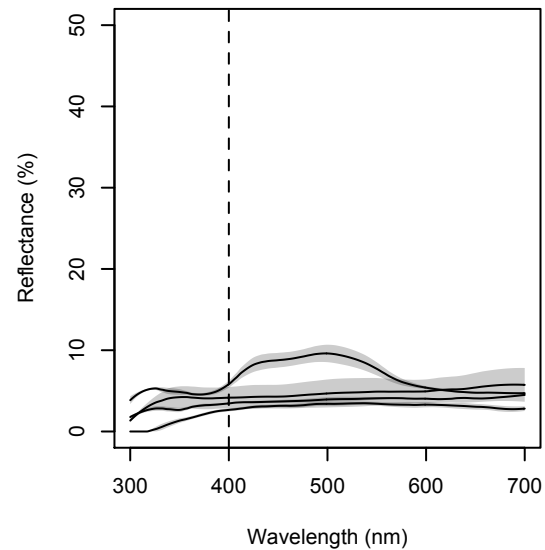**abdominal background**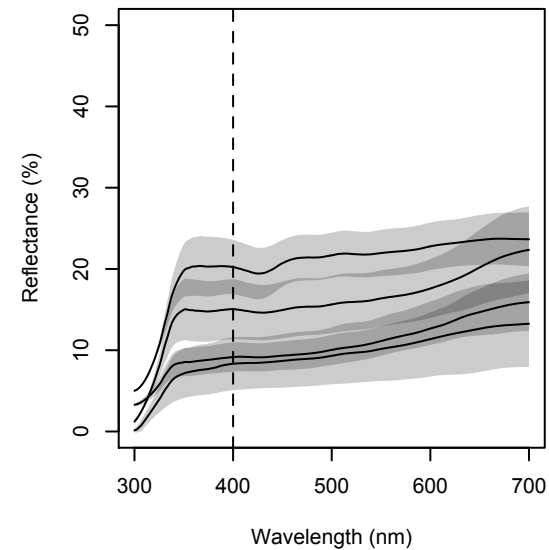**throat blue**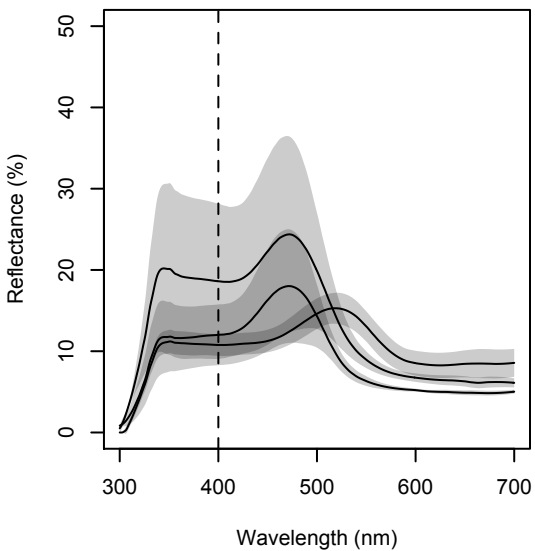**throat background**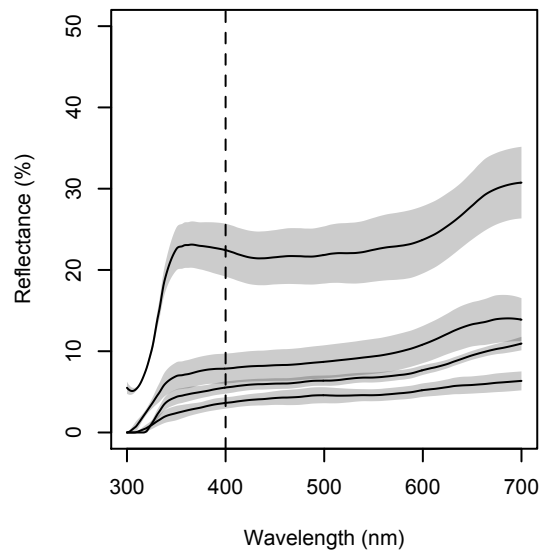**dorsal background**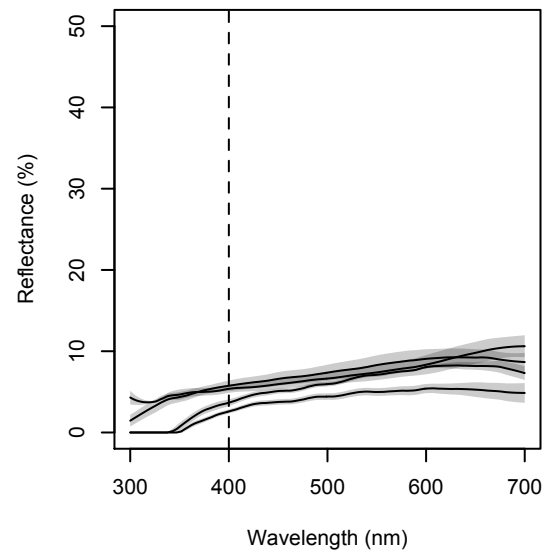**dorsal blue**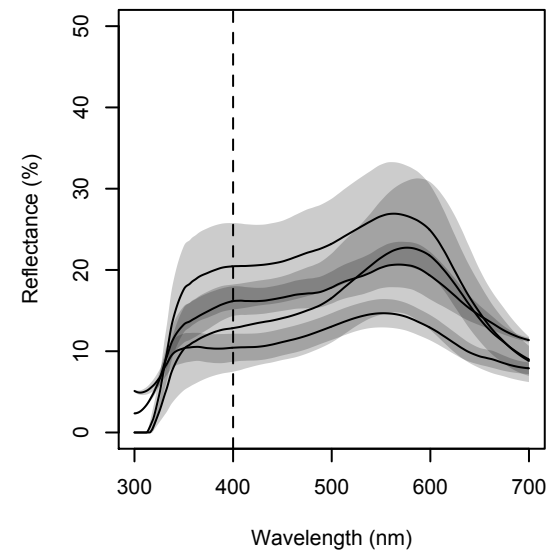

Supplement: pone.0182146.s005.pdf [file pone.0182146.s005.pdf]
